# Supplementary material for: Comprehensive Behavioral Analysis of Opsin 3 (Encephalopsin)-Deficient Mice Identifies Role in Modulation of Acoustic Startle Reflex
Source: eNeuro. 2022 Sep 27;9(5):ENEURO.0202-22.2022. doi: 10.1523/ENEURO.0202-22.2022 (PMC9532019; doi:10.1523/ENEURO.0202-22.2022)
Supplement: Extended Data Table 1-1 — Statistical table. It contains relevant statistical information for all statistical tests performed, included test performed for each experiment, n for each condition, and all p-values. Download Table 1-1, XLS file. [file enu-eN-NWR-0202-22-s04.xls]

## Sheet: Acoustic Startle Reflex and PPI
Acoustic Startle Reflex & PPI	n						Acoustic Startle Reflex & PPI	n
Opn3+/+	30						Opn3flox/flox	26
Opn3lacZ/lacZ	28						Opn3flox/flox; Emx1-cre	27
Male	30						Male	25
Female	28						Female	28
Male Opn3+/+	15						Male Opn3flox/flox	12
Female Opn3 +/+	15						Female Opn3flox/flox	14
Male Opn3lacZ/lacZ	15						Male Opn3flox/flox; Emx1-cre	13
Female Opn3lacZ/lacZ	13						Female Opn3flox/flox; Emx1-cre	14
Dependent Variables	Vmax (Day 1), Vmax (Day 2)						Dependent Variables	Vmax (CT2 Dark), Vmax (CT2 Light), Vmax (CT16 Dark), Vmax (CT16 Light)
Covariance Structure	Autoregressive Moving Average						Covariance Structure	Autoregressive Moving Average
Estimation Method	REML						Estimation Method	REML
Residual Variance Method	Profile						Residual Variance Method	Profile
Fixed Effects SE Method	Prasad-Rao-Jeske-Kackar-Harville						Fixed Effects SE Method	Prasad-Rao-Jeske-Kackar-Harville
Degrees of Freedom Method	Kenward-Roger						Degrees of Freedom Method	Kenward-Roger
Variable	Vmax (Day 1)						Variable	Vmax (CT2 Dark)
Statistical Test	Type 3 Test of Fixed Effects						Statistical Test	Type 3 Test of Fixed Effects
Summary	Num DF	Den DF	F value	p-value			Summary	Num DF	Den DF	F value	p-value
Genotype	1	49.9	7.87	0.0071			Genotype	1	38.1	2.82	0.1011
Sex	1	49.9	0	0.9568			Sex	1	38.1	2.19	0.1472
Genotype*Sex	1	49.9	0.04	0.8361			Genotype*Sex	1	38.1	4.89	0.033
Trial	3	103	93.11	<0.0001			Trial	3	115	36.13	<0.0001
Genotype*Trial	3	103	5.6	0.0013			Genotype*Trial	3	115	3.34	0.0217
Sex*Trial	3	103	0.43	0.7341			Sex*Trial	3	115	2.47	0.0655
Genotype*Sex*Trial	3	103	0.69	0.5597			Genotype*Sex*Trial	3	115	3.64	0.0149
Variable	Vmax (Day 1)						Variable	Vmax (CT2 Dark)
Statistical Test	F Test for Genotype*Trial Least Square Means Slice						Statistical Test	F Test for Genotype*Trial Least Square Means Slice
Summary	Num DF	Den DF	F value	p-value			Summary	Num DF	Den DF	F value	p-value
Trial PPI 0	1	77.07	16.27	0.0001			Trial PPI 0	1	154.2	11.4	0.0009
Trial PPI 59	1	77.07	9.91	0.0023			Trial PPI 59	1	154.2	0.78	0.3775
Trial PPI 70	1	77.07	3.36	0.0706			Trial PPI 70	1	154.2	0.04	0.8343
Trial PPI 80	1	77.07	0.84	0.362			Trial PPI 80	1	154.2	0.08	0.7773
Variable	Vmax (Day 2)						Variable	Vmax (CT2 Dark)
Statistical Test	Type 3 Test of Fixed Effects						Statistical Test	F Test for Genotype*Sex Square Means Slice
Summary	Num DF	Den DF	F value	p-value			Summary	Num DF	Den DF	F value	p-value
Genotype	1	51	13.25	0.0006			Male	1	38.08	7.16	0.0109
Sex	1	51	0.15	0.7011			Female	1	38.08	0.15	0.7004
Genotype*Sex	1	51	0.13	0.7185
Trial	3	98.6	96.28	<0.0001			Variable	Vmax (CT2 Dark)
Genotype*Trial	3	98.6	10.02	<0.0001			Statistical Test	F Test for Genotype*Sex*Trial Least Square Means Slice
Sex*Trial	3	98.6	0.08	0.9709			Summary	Num DF	Den DF	F value	p-value
Genotype*Sex*Trial	3	98.6	0.84	0.4726			Male Trial PPI 0	1	154.2	24.04	<0.0001
							Male Trial PPI 59	1	154.2	2.83	0.0943
Variable	Vmax (Day 2)						Male Trial PPI 70	1	154.2	0.01	0.9078
Statistical Test	F Test for Genotype*Trial Least Square Means Slice						Male Trial PPI 80	1	154.2	0	0.9749
Summary	Num DF	Den DF	F value	p-value			Female Trial PPI 0	1	154.2	0.08	0.7833
Trial PPI 0	1	76.96	25.42	<0.0001			Female Trial PPI 59	1	154.2	0.24	0.6221
Trial PPI 59	1	76.96	18.56	<0.0001			Female Trial PPI 70	1	154.2	0.03	0.8554
Trial PPI 70	1	76.96	5.06	0.0273			Female Trial PPI 80	1	154.2	0.14	0.7049
Trial PPI 80	1	76.96	1.9	0.1724
							Variable	Vmax (CT2 Light)
							Statistical Test	Type 3 Test of Fixed Effects
							Summary	Num DF	Den DF	F value	p-value
							Genotype	1	34.1	1.42	0.2409
							Sex	1	34.1	1.44	0.2384
							Genotype*Sex	1	34.1	1.42	0.2423
							Trial	3	113	52.36	<0.0001
							Genotype*Trial	3	113	2.5	0.0627
							Sex*Trial	3	113	1.22	0.3061
							Genotype*Sex*Trial	3	113	1.11	0.3493
							Variable	Vmax (CT16 Dark)
							Statistical Test	Type 3 Test of Fixed Effects
							Summary	Num DF	Den DF	F value	p-value
							Genotype	1	38.1	2.82	0.1011
							Sex	1	38.1	2.19	0.1472
							Genotype*Sex	1	38.1	4.89	0.033
							Trial	3	115	36.13	<0.0001
							Genotype*Trial	3	115	3.34	0.0217
							Sex*Trial	3	115	2.47	0.0655
							Genotype*Sex*Trial	3	115	3.64	0.0149
							Variable	Vmax (CT16 Dark)
							Statistical Test	F Test for Genotype*Trial Least Square Means Slice
							Summary	Num DF	Den DF	F value	p-value
							Trial PPI 0	1	154.2	11.4	0.0009
							Trial PPI 59	1	154.2	0.78	0.3775
							Trial PPI 70	1	154.2	0.04	0.8343
							Trial PPI 80	1	154.2	0.08	0.7773
							Variable	Vmax (CT16 Dark)
							Statistical Test	F Test for Genotype*Sex Square Means Slice
							Summary	Num DF	Den DF	F value	p-value
							Male	1	38.08	7.16	0.0109
							Female	1	38.08	0.15	0.7004
							Variable	Vmax (CT16 Dark)
							Statistical Test	F Test for Genotype*Sex*Trial Least Square Means Slice
							Summary	Num DF	Den DF	F value	p-value
							Male Trial PPI 0	1	154.2	24.04	<0.0001
							Male Trial PPI 59	1	154.2	2.83	0.0943
							Male Trial PPI 70	1	154.2	0.01	0.9078
							Male Trial PPI 80	1	154.2	0	0.9749
							Female Trial PPI 0	1	154.2	0.08	0.7833
							Female Trial PPI 59	1	154.2	0.24	0.6221
							Female Trial PPI 70	1	154.2	0.03	0.8554
							Female Trial PPI 80	1	154.2	0.14	0.7049
							Variable	Vmax (CT16 Light)
							Statistical Test	Type 3 Test of Fixed Effects
							Summary	Num DF	Den DF	F value	p-value
							Genotype	1	35.4	1.99	0.1676
							Sex	1	35.4	1.58	0.2169
							Genotype*Sex	1	35.4	0.92	0.3443
							Trial	3	115	34.71	<0.0001
							Genotype*Trial	3	115	3.35	0.0215
							Sex*Trial	3	115	1.64	0.1851
							Genotype*Sex*Trial	3	115	1.37	0.2565
							Variable	Vmax (CT16 Light)
							Statistical Test	F Test for Genotype*Trial Least Square Means Slice
							Summary	Num DF	Den DF	F value	p-value
							Trial PPI 0	1	128.3	10.28	0.0017
							Trial PPI 59	1	128.3	0.27	0.6021
							Trial PPI 70	1	128.3	0.06	0.8123
							Trial PPI 80	1	128.3	0.03	0.8619

## Sheet: Auditory Brainstem Response
ABR	n
WT	3
lacZ/lacZ	3
Male	6
Female	0
WT male	3
WT female	0
lacZ/lacZ Male	3
lacZ/lacZ female	0
Variable	ABR Threshold (Click), ABR Threshold (Toneburst)
Variable	ABR Threshold (Click)
Statistical Test	Two-tailed Unpaired T Test
Summary	Num DF	Den DF	F value	p-value
Genotype	2	2	3	0.5
Variable	ABR Threshold (Toneburst)
Statistical Test	Two-way RM ANOVA
Summary	Num DF	Den DF	F value	p-value
Genotype	1	4	3.063	0.155
Frequency	1.367	5.468	22.06	0.0033
Frequency*Genotype	2	8	0.4808	0.6351
Subject	4	8	0.3077	0.8651

## Sheet: Rotarod
Rotarod	n
Opn3+/+	18
Opn3lacZ/lacZ	15
Male	18
Female	15
Male Opn3+/+	10
Female Opn3 +/+	8
Male Opn3lacZ/lacZ	8
Female Opn3lacZ/lacZ	7
Dependent Variables	Latency to Fall, Distance
Covariance Structure	Autoregressive Moving Average
Estimation Method	REML
Residual Variance Method	Profile
Fixed Effects SE Method	Prasad-Rao-Jeske-Kackar-Harville
Degrees of Freedom Method	Kenward-Roger
Variable	Latency to Fall
Statistical Test	Type 3 Test of Fixed Effects
Summary	Num DF	Den DF	F value	p-value
Genotype	1	29	0.02	0.9007
Sex	1	29	2.12	0.1558
Genotype*Sex	1	29	0.09	0.7633
Day	1	29	8.88	0.0058
Genotype*Day	1	29	0.77	0.3878
Sex*Day	1	29	0.43	0.5177
Genotype*Sex*Day	1	29	0.39	0.5357
Variable	Distance
Statistical Test	Type 3 Test of Fixed Effects
Summary	Num DF	Den DF	F value	p-value
Genotype	1	29	0.01	0.938
Sex	1	29	2.39	0.1331
Genotype*Sex	1	29	0.09	0.7704
Day	1	29	10.15	0.0034
Genotype*Day	1	29	0.8	0.3798
Sex*Day	1	29	0.81	0.3756
Genotype*Sex*Day	1	29	0.53	0.4722

## Sheet: Social Approach
Social Approach	n
Opn3+/+	18
Opn3lacZ/lacZ	15
Male	18
Female	15
Male Opn3+/+	10
Female Opn3 +/+	8
Male Opn3lacZ/lacZ	8
Female Opn3lacZ/lacZ	7
Dependent Variables	Stranger Time, Center Time, Empty Time
Covariance Structure	Autoregressive Moving Average
Estimation Method	REML
Residual Variance Method	Profile
Fixed Effects SE Method	Prasad-Rao-Jeske-Kackar-Harville
Degrees of Freedom Method	Kenward-Roger
Variable	Stranger Time
Statistical Test	Type 3 Test of Fixed Effects
Summary	Num DF	Den DF	F value	p-value
Genotype	1	29	0.36	0.5523
Sex	1	29	0.17	0.6874
Genotype*Sex	1	29	0.11	0.7426
Stage	1	29	104.5	<0.0001
Genotype*Stage	1	29	1.78	0.1922
Sex*Stage	1	29	0.34	0.566
Genotype*Sex*Stage	1	29	0.72	0.4036
Variable	Center Time
Statistical Test	Type 3 Test of Fixed Effects
Summary	Num DF	Den DF	F value	p-value
Genotype	1	29	1.46	0.2363
Sex	1	29	0.26	0.6138
Genotype*Sex	1	29	0	0.9461
Stage	1	29	40.14	<0.0001
Genotype*Stage	1	29	3.57	0.0689
Sex*Stage	1	29	0.92	0.3464
Genotype*Sex*Stage	1	29	1.21	0.2796
Variable	Empty Time
Statistical Test	Type 3 Test of Fixed Effects
Summary	Num DF	Den DF	F value	p-value
Genotype	1	29	0.36	0.5549
Sex	1	29	0.09	0.7643
Genotype*Sex	1	29	0.03	0.8667
Stage	1	29	3.91	0.0575
Genotype*Stage	1	29	0.56	0.4601
Sex*Stage	1	29	2.57	0.1197
Genotype*Sex*Stage	1	29	0.05	0.8215

## Sheet: Elevated Zero Maze
EZM	n
Opn3+/+	30
Opn3lacZ/lacZ	28
Male	30
Female	28
Male Opn3+/+	15
Female Opn3 +/+	15
Male Opn3lacZ/lacZ	15
Female Opn3lacZ/lacZ	13
Dependent Variables	Latency to Open, Time in Open, Head Dips
Covariance Structure	Diagonal
Estimation Method	REML
Residual Variance Method	Profile
Fixed Effects SE Method	Model-Based
Degrees of Freedom Method	Residual
Variable	Latency to Open
Statistical Test	Type 3 Test of Fixed Effects
Summary	Num DF	Den DF	F value	p-value
Genotype	1	54	0.33	0.5676
Sex	1	54	0.31	0.577
Genotype*Sex	1	54	0.21	0.6469
Variable	Time in Open
Statistical Test	Type 3 Test of Fixed Effects
Summary	Num DF	Den DF	F value	p-value
Genotype	1	54	0.02	0.8943
Sex	1	54	1.1	0.298
Genotype*Sex	1	54	0.29	0.5904
Variable	Head Dips
Statistical Test	Type 3 Test of Fixed Effects
Summary	Num DF	Den DF	F value	p-value
Genotype	1	54	0.3	0.5885
Sex	1	54	1.66	0.2028
Genotype*Sex	1	54	0.2	0.6554

## Sheet: Fear Conditioning
Fear Conditioning	n
Opn3+/+	30
Opn3lacZ/lacZ	28
Male	30
Female	28
Male Opn3+/+	15
Female Opn3 +/+	15
Male Opn3lacZ/lacZ	15
Female Opn3lacZ/lacZ	13
Dependent Variables	Beam Breaks (Acquisition), Beam Breaks (Cue), Beam Breaks (Extinction)
Covariance Structure	Autoregressive Moving Average
Estimation Method	REML
Residual Variance Method	Profile
Fixed Effects SE Method	Prasad-Rao-Jeske-Kackar-Harville
Degrees of Freedom Method	Kenward-Roger
Variable	Beam Breaks (Acquisition)
Statistical Test	Type 3 Test of Fixed Effects
Summary	Num DF	Den DF	F value	p-value
Genotype	1	57.9	0.14	0.706
Sex	1	57.9	3.42	0.0696
Genotype*Sex	1	57.9	2.41	0.126
Interval	9	396	108.84	<0.0001
Genotype*Interval	9	396	0.81	0.6081
Sex*Interval	9	396	1.33	0.2178
Genotype*Sex*Interval	9	396	0.63	0.7746
Variable	Beam Breaks (Cue)
Statistical Test	Type 3 Test of Fixed Effects
Summary	Num DF	Den DF	F value	p-value
Genotype	1	54.2	1.27	0.2653
Sex	1	54.2	0	0.9807
Genotype*Sex	1	54.2	1.19	0.2794
Interval	19	896	14.59	<0.0001
Genotype*Interval	19	896	1.12	0.328
Sex*Interval	19	896	1.37	0.1338
Genotype*Sex*Interval	19	896	0.74	0.7842
Variable	Beam Breaks (Extinction)
Statistical Test	Type 3 Test of Fixed Effects
Summary	Num DF	Den DF	F value	p-value
Genotype	1	53.1	1.08	0.3024
Sex	1	53.1	5.68	0.0208
Genotype*Sex	1	53.1	0.52	0.4746
Interval	9	380	15.99	<0.0001
Genotype*Interval	9	380	0.63	0.7677
Sex*Interval	9	380	0.74	0.6713
Genotype*Sex*Interval	9	380	1.64	0.1032
Dependent Variables	Beam Breaks (Context)
Covariance Structure	Diagonal
Estimation Method	REML
Residual Variance Method	Profile
Fixed Effects SE Method	Model-Based
Degrees of Freedom Method	Residual
Variable	Beam Breaks (Conditioning)
Statistical Test	Type 3 Test of Fixed Effects
Summary	Num DF	Den DF	F value	p-value
Genotype	1	52	0.83	0.3661
Sex	1	52	11.55	0.0013
Genotype*Sex	1	52	0.79	0.3793

## Sheet: Novel Object Recognition
NOR	n
Opn3+/+	18
Opn3lacZ/lacZ	15
Male	18
Female	15
Male Opn3+/+	10
Female Opn3 +/+	8
Male Opn3lacZ/lacZ	8
Female Opn3lacZ/lacZ	7
Dependent Variables	Time with Novel Object
Covariance Structure	Diagonal
Estimation Method	REML
Residual Variance Method	Profile
Fixed Effects SE Method	Model-Based
Degrees of Freedom Method	Residual
Variable	Time with Novel Object
Statistical Test	Type 3 Test of Fixed Effects
Summary	Num DF	Den DF	F value	p-value
Genotype	1	29	0.38	0.5416
Sex	1	29	2.31	0.1395
Genotype*Sex	1	29	1.16	0.2896

## Sheet: Morris Water Maze
Fear Conditioning (Acquisition - Training)	n						Fear Conditioning (Acquisition - Probe)	n					Fear Conditioning (Reversal - Training)	n					Fear Conditioning (Reversal - Probe)	n					Fear Conditioning (Cued Random - Training)	n					Fear Conditioning (Cued Random - Probe)	n
Opn3+/+	30						Opn3+/+	30					Opn3+/+	30					Opn3+/+	30					Opn3+/+	30					Opn3+/+	30
Opn3lacZ/lacZ	28						Opn3lacZ/lacZ	28					Opn3lacZ/lacZ	28					Opn3lacZ/lacZ	28					Opn3lacZ/lacZ	28					Opn3lacZ/lacZ	28
Male	30						Male	30					Male	30					Male	30					Male	30					Male	30
Female	28						Female	28					Female	28					Female	28					Female	28					Female	28
Male Opn3+/+	15						Male Opn3+/+	15					Male Opn3+/+	15					Male Opn3+/+	15					Male Opn3+/+	15					Male Opn3+/+	15
Female Opn3 +/+	15						Female Opn3 +/+	15					Female Opn3 +/+	15					Female Opn3 +/+	15					Female Opn3 +/+	15					Female Opn3 +/+	15
Male Opn3lacZ/lacZ	15						Male Opn3lacZ/lacZ	15					Male Opn3lacZ/lacZ	15					Male Opn3lacZ/lacZ	15					Male Opn3lacZ/lacZ	15					Male Opn3lacZ/lacZ	15
Female Opn3lacZ/lacZ	13						Female Opn3lacZ/lacZ	13					Female Opn3lacZ/lacZ	13					Female Opn3lacZ/lacZ	13					Female Opn3lacZ/lacZ	13					Female Opn3lacZ/lacZ	13
Dependent Variables	Latency, Length, Efficiency, Speed						Dependent Variables	Quad Time, Distance, Crossings, Speed					Dependent Variables	Latency, Length, Efficiency, Speed					Dependent Variables	Quad Time, Distance, Crossings, Speed					Dependent Variables	Latency					Dependent Variables	Latency
Covariance Structure	Autoregressive Moving Average						Covariance Structure	Autoregressive Moving Average					Covariance Structure	Autoregressive Moving Average					Covariance Structure	Autoregressive Moving Average					Covariance Structure	Autoregressive Moving Average					Covariance Structure	Autoregressive Moving Average
Estimation Method	REML						Estimation Method	REML					Estimation Method	REML					Estimation Method	REML					Estimation Method	REML					Estimation Method	REML
Residual Variance Method	Profile						Residual Variance Method	Profile					Residual Variance Method	Profile					Residual Variance Method	Profile					Residual Variance Method	Profile					Residual Variance Method	Profile
Fixed Effects SE Method	Prasad-Rao-Jeske-Kackar-Harville						Fixed Effects SE Method	Prasad-Rao-Jeske-Kackar-Harville					Fixed Effects SE Method	Prasad-Rao-Jeske-Kackar-Harville					Fixed Effects SE Method	Prasad-Rao-Jeske-Kackar-Harville					Fixed Effects SE Method	Prasad-Rao-Jeske-Kackar-Harville					Fixed Effects SE Method	Prasad-Rao-Jeske-Kackar-Harville
Degrees of Freedom Method	Kenward-Roger						Degrees of Freedom Method	Kenward-Roger					Degrees of Freedom Method	Kenward-Roger					Degrees of Freedom Method	Kenward-Roger					Degrees of Freedom Method	Kenward-Roger					Degrees of Freedom Method	Kenward-Roger
Variable	Latency						Variable	Quad Time					Variable	Latency					Variable	Quad Time					Variable	Latency					Variable	Latency
Statistical Test	Type 3 Test of Fixed Effects						Statistical Test	Type 3 Test of Fixed Effects					Statistical Test	Type 3 Test of Fixed Effects					Statistical Test	Type 3 Test of Fixed Effects					Statistical Test	Type 3 Test of Fixed Effects					Statistical Test	Type 3 Test of Fixed Effects
Summary	Num DF	Den DF	F value	p-value			Summary	Num DF	Den DF	F value	p-value		Summary	Num DF	Den DF	F value	p-value		Summary	Num DF	Den DF	F value	p-value		Summary	Num DF	Den DF	F value	p-value		Summary	Num DF	Den DF	F value	p-value
Genotype	1	54.7	0.03	0.8642			Genotype	1	54	0.11	0.7372		Genotype	1	52.4	0	0.9456		Genotype	1	53	0.54	0.4663		Genotype	1	51.8	0.39	0.5351		Genotype	1	53	0.28	0.5963
Sex	1	54.7	0.22	0.6408			Sex	1	54	0.18	0.6701		Sex	1	52.4	4.43	0.0402		Sex	1	53	0.83	0.3658		Sex	1	51.8	3.17	0.0808		Sex	1	53	1.83	0.1815
Genotype*Sex	1	54.7	1.57	0.2154			Genotype*Sex	1	54	1.63	0.2077		Genotype*Sex	1	52.4	0.73	0.397		Genotype*Sex	1	53	0.12	0.7278		Genotype*Sex	1	51.8	0.49	0.489		Genotype*Sex	1	53	0.08	0.7761
Day	4	178	36.61	<0.0001			Day	1	53.1	7.13	0.0101		Day	4	162	21.34	<0.0001		Day	1	53	0.1	0.7521		Day	5	171	43.86	<0.0001		Day	1	53	3.16	0.0812
Genotype*Day	4	178	0.15	0.9631			Genotype*Day	1	53.1	1.43	0.2373		Genotype*Day	4	162	0.51	0.7252		Genotype*Day	1	53	1	0.3217		Genotype*Day	5	171	0.44	0.8234		Genotype*Day	1	53	0.36	0.5522
Sex*Day	4	178	4.42	0.002			Sex*Day	1	53.1	0.06	0.8093		Sex*Day	4	162	0.43	0.7863		Sex*Day	1	53	0.02	0.8863		Sex*Day	5	171	0.7	0.6218		Sex*Day	1	53	1.51	0.2239
Genotype*Sex*Day	4	178	2.37	0.0543			Genotype*Sex*Day	1	53.1	0	0.9643		Genotype*Sex*Day	4	162	0.73	0.5714		Genotype*Sex*Day	1	53	0.09	0.7613		Genotype*Sex*Day	5	171	0.97	0.4355		Genotype*Sex*Day	1	53	2.46	0.1228
Variable	Latency						Variable	Distance					Variable	Length					Variable	Distance
Statistical Test	F Test for Genotype*Sex*Day Least Square Means Slice						Statistical Test	Type 3 Test of Fixed Effects					Statistical Test	Type 3 Test of Fixed Effects					Statistical Test	Type 3 Test of Fixed Effects
Summary	Num DF	Den DF	F value	p-value			Summary	Num DF	Den DF	F value	p-value		Summary	Num DF	Den DF	F value	p-value		Summary	Num DF	Den DF	F value	p-value
Male Day 1	1	232	2.25	0.1347			Genotype	1	53.4	0.26	0.6108		Genotype	1	54	0.02	0.8933		Genotype	1	53	0.06	0.812
Male Day 2	1	232	1.84	0.1757			Sex	1	53.4	0.02	0.8902		Sex	1	54	3.67	0.0607		Sex	1	53	0.88	0.352
Male Day 3	1	232	0.77	0.3821			Genotype*Sex	1	53.4	0.14	0.7104		Genotype*Sex	1	54	0.44	0.5103		Genotype*Sex	1	53	0.04	0.8509
Male Day 4	1	232	0.13	0.7229			Day	1	53	4.99	0.0298		Day	4	164	18.1	<0.0001		Day	1	53	6.62	0.0129
Male Day 5	1	232	0.52	0.4722			Genotype*Day	1	53	0.06	0.8118		Genotype*Day	4	164	0.9	0.463		Genotype*Day	1	53	0.06	0.813
Female Day 1	1	232	3.48	0.0633			Sex*Day	1	53	2.1	0.1527		Sex*Day	4	164	0.25	0.9111		Sex*Day	1	53	0.88	0.3525
Female Day 2	1	232	1.59	0.2084			Genotype*Sex*Day	1	53	1.03	0.3159		Genotype*Sex*Day	4	164	0.37	0.8271		Genotype*Sex*Day	1	53	0.03	0.8528
Female Day 3	1	232	0.65	0.4224
Female Day 4	1	232	0.04	0.8438			Variable	Crossings					Variable	Path Efficiency					Variable	Crossings
Female Day 5	1	232	0.08	0.7764			Statistical Test	Type 3 Test of Fixed Effects					Statistical Test	Type 3 Test of Fixed Effects					Statistical Test	Type 3 Test of Fixed Effects
							Summary	Num DF	Den DF	F value	p-value		Summary	Num DF	Den DF	F value	p-value		Summary	Num DF	Den DF	F value	p-value
Variable	Length						Genotype	1	53.8	0.2	0.6572		Genotype	1	55.5	0.99	0.323		Genotype	1	53	0.42	0.5214
Statistical Test	Type 3 Test of Fixed Effects						Sex	1	53.8	0.02	0.8813		Sex	1	55.5	1.44	0.2349		Sex	1	53	1.09	0.3004
Summary	Num DF	Den DF	F value	p-value			Genotype*Sex	1	53.8	0.63	0.4295		Genotype*Sex	1	55.5	0.36	0.549		Genotype*Sex	1	53	1.38	0.2451
Genotype	1	55.3	0	0.9649			Day	1	53.1	11.15	0.0015		Day	4	173	18.14	<0.0001		Day	1	53	16.82	0.0001
Sex	1	55.3	0.57	0.4545			Genotype*Day	1	53.1	0.43	0.5152		Genotype*Day	4	173	0.17	0.9523		Genotype*Day	1	53	10.68	0.0019
Genotype*Sex	1	55.3	0.52	0.4735			Sex*Day	1	53.1	3.2	0.0796		Sex*Day	4	173	0.41	0.8037		Sex*Day	1	53	2.65	0.1095
Day	4	178	37.17	<0.0001			Genotype*Sex*Day	1	53.1	1.02	0.318		Genotype*Sex*Day	4	173	0.72	0.5777		Genotype*Sex*Day	1	53	0.28	0.5983
Genotype*Day	4	178	0.4	0.8083
Sex*Day	4	178	3.85	0.005			Variable	Speed					Variable	Speed					Variable	Crossings
Genotype*Sex*Day	4	178	1.8	0.1315			Statistical Test	Type 3 Test of Fixed Effects					Statistical Test	Type 3 Test of Fixed Effects					Statistical Test	F Test for Genotype*Sex*Day Least Square Means Slice
							Summary	Num DF	Den DF	F value	p-value		Summary	Num DF	Den DF	F value	p-value		Summary	Num DF	Den DF	F value	p-value
Variable	Path Efficiency						Genotype	1	54.2	0.77	0.3836		Genotype	1	43.3	1.54	0.2219		Day 1	1	104.7	7.07	0.0091
Statistical Test	Type 3 Test of Fixed Effects						Sex	1	54.2	2.93	0.0926		Sex	1	43.3	0	0.9773		Day 2	1	104.7	2.88	0.0928
Summary	Num DF	Den DF	F value	p-value			Genotype*Sex	1	54.2	1.06	0.3079		Genotype*Sex	1	43.3	0.17	0.6779
Genotype	1	54.9	0.01	0.909			Day	1	53.6	0.55	0.4628		Day	4	97	5.71	0.0004		Variable	Speed
Sex	1	54.9	0.6	0.4419			Genotype*Day	1	53.6	1.24	0.2699		Genotype*Day	4	97	1.1	0.363		Statistical Test	Type 3 Test of Fixed Effects
Genotype*Sex	1	54.9	0.06	0.815			Sex*Day	1	53.6	0.13	0.7153		Sex*Day	4	97	0.9	0.4691		Summary	Num DF	Den DF	F value	p-value
Day	4	176	19.04	<0.0001			Genotype*Sex*Day	1	53.6	1.06	0.3079		Genotype*Sex*Day	4	97	0.05	0.9955		Genotype	1	53.1	1.91	0.1731
Genotype*Day	4	176	1.78	0.1351															Sex	1	53.1	0.19	0.6619
Sex*Day	4	176	1.51	0.2014															Genotype*Sex	1	53.1	0.16	0.6928
Genotype*Sex*Day	4	176	0.43	0.789															Day	1	52.7	0.28	0.5965
																			Genotype*Day	1	52.7	0.02	0.8972
Variable	Speed																		Sex*Day	1	52.7	0.36	0.5536
Statistical Test	Type 3 Test of Fixed Effects																		Genotype*Sex*Day	1	52.7	2.47	0.1223
Summary	Num DF	Den DF	F value	p-value
Genotype	1	56.2	0.01	0.9226
Sex	1	56.2	0	0.9662
Genotype*Sex	1	56.2	1.58	0.2142
Day	4	162	1.81	0.1299
Genotype*Day	4	162	2.61	0.0378
Sex*Day	4	162	0.48	0.75
Genotype*Sex*Day	4	162	0.3	0.8787
Variable	Speed
Statistical Test	F Test for Genotype*Sex*Day Least Square Means Slice
Summary	Num DF	Den DF	F value	p-value
Day 1	1	230.8	0.38	0.5367
Day 2	1	230.8	0.95	0.3314
Day 3	1	230.8	2.3	0.1303
Day 4	1	230.8	2.87	0.0916
Day 5	1	230.8	2.93	0.0884
